# Supplementary material for: Urbanisation modulates plant-pollinator interactions in invasive vs. native plant species
Source: PubMed Central journal article supplement (PMC6477046; doi:10.1038/s41598-019-42884-6), 2019-04-23
Supplement: 41598_2019_42884_MOESM1_ESM.pdf [file 41598_2019_42884_MOESM1_ESM.pdf]

## Urbanisation modulates plant-pollinator interactions in invasive vs. native plant species

Sascha Buchholz & Ingo Kowarik

### Appendix 1: Spatial and environmental data at study sites.

| ID | Location          | Percentage |              | Number of     |           | Percentage      |
|----|-------------------|------------|--------------|---------------|-----------|-----------------|
|    | Long / lat        | Vegetation | Herbal layer | Plant species | Neophytes | Impervious area |
| 1  | 13.30888/52.40597 | 99         | 70           | 33            | 2         | 15.03           |
| 2  | 13.24265/52.48820 | 95         | 45           | 26            | 2         | 4.38            |
| 3  | 13.37276/52.48854 | 75         | 40           | 29            | 4         | 62.49           |
| 4  | 13.38538/52.53438 | 75         | 55           | 32            | 7         | 62.78           |
| 5  | 13.37698/52.53825 | 100        | 70           | 29            | 1         | 61.56           |
| 6  | 13.35908/52.46165 | 99         | 50           | 25            | 2         | 32.73           |
| 7  | 13.19511/52.47137 | 95         | 75           | 31            | 3         | 6.11            |
| 8  | 13.09988/52.41562 | 96         | 70           | 26            | 3         | 6.69            |
| 9  | 13.24726/52.58265 | 85         | 60           | 31            | 2         | 1.19            |
| 10 | 13.31621/52.45679 | 100        | 90           | NA            | NA        | 59.07           |

**Appendix 2:** Total counts for pollinator taxa interacting with flowering branches of the invasive alien plant *Robinia pseudoacacia* and the native plant *Cytisus scoparius*. Diptera s. l. comprised all flies except Syrphidae. Insects were assigned to Hymenoptera s. l. when differentiation between honey bees and wild bees was not possible.

| Taxon                   | <i>Robinia pseudoacacia</i> |           |          | <i>Cytisus scoparius</i> |           |          |
|-------------------------|-----------------------------|-----------|----------|--------------------------|-----------|----------|
|                         | Total                       | Immediate |          | Total                    | Immediate |          |
|                         | Contacts                    | access    | Hovering | Contacts                 | access    | Hovering |
| Coleoptera              | 3                           | 1         | 2        | 9                        | 7         | 2        |
| Lepidoptera             | 2                           | 0         | 2        | 0                        | 0         | 0        |
| Hymenoptera s. l.       | 52                          | 39        | 12       | 63                       | 44        | 19       |
| - Apiformes             | 3                           | 0         | 3        | 4                        | 4         | 0        |
| - Apocrita              | 1                           | 1         | 0        | 1                        | 1         | 0        |
| - <i>Bombus spec.</i>   | 5                           | 0         | 5        | 19                       | 13        | 6        |
| - <i>Apis mellifera</i> | 7                           | 2         | 5        | 10                       | 5         | 5        |
| Diptera s. l.           | 70                          | 33        | 37       | 77                       | 58        | 19       |
| - Syrphidae             | 4                           | 2         | 2        | 4                        | 3         | 1        |
